# Supplementary material for: Association of Fatigue With Sarcopenia and its Elements: A Secondary Analysis of SABE-Bogotá
Source: PubMed Central journal article supplement — Gerontol Geriatr Med. 2017 Apr 10;3:2333721417703734. doi: 10.1177/2333721417703734 (PMC5407660; doi:10.1177/2333721417703734), 2017-04-10
Supplement: Supplementary_Table_1.pdf [file Supplementary_Table_1.pdf]

**Supplementary Table 1.** Cut-off Values for Handgrip Strength According to BMI  
 Quartile and Sex and Gait Speed According to Height and Sex

| Grip Strength (kg) |               |    |                |    |
|--------------------|---------------|----|----------------|----|
| Quartiles of BMI   | Q1            | Q2 | Q3             | Q4 |
| Men                | 20            | 22 | 24             | 24 |
| Women              | 12            | 14 | 13             | 14 |
| Gait Speed (m/s)   |               |    |                |    |
| Groups of Height   | Mean or above |    | Below the mean |    |
| Men                | 0.6           |    | 0.48           |    |
| Women              | 0.48          |    | 0.48           |    |
